1

2 **A shift in aggregation avoidance strategy marks a long-term**  
3 **direction to protein evolution**

4 Authors: S.G. Foy<sup>1,2</sup>, B.A. Wilson<sup>1</sup>, J. Bertram<sup>1</sup>, M.H.J. Cordes<sup>3</sup>, J. Mase<sup>1\*</sup>

5 Affiliations:

6 <sup>1</sup>Department of Ecology and Evolutionary Biology, University of Arizona, 1041 E Lowell St  
7 Tucson AZ 85721 USA.

8 <sup>2</sup>present address: St. Jude Children's Research Hospital, Memphis, Tennessee.

9 <sup>3</sup>Department of Chemistry & Biochemistry, University of Arizona.

10

11 \*Correspondence to: [mase@email.arizona.edu](mailto:mase@email.arizona.edu)

12 Short title: Long-term direction to protein evolution

13

14 Keywords: phylostratigraphy, gene age, aggregation propensity, protein folding, protein  
15 misfolding

16

## Abstract

17 To detect a direction to evolution, without the pitfalls of reconstructing ancestral states, we  
18 need to compare “more evolved” to “less evolved” entities. But because all extant species have  
19 the same common ancestor, none are chronologically more evolved than any other. However,  
20 different gene families were born at different times, allowing us to compare young protein-  
21 coding genes to those that are older and hence have been evolving for longer. To be retained  
22 during evolution, a protein must not only have a function, but must also avoid toxic dysfunction  
23 such as protein aggregation. There is conflict between the two requirements; hydrophobic  
24 amino acids form the cores of protein folds, but also promote aggregation. Young genes avoid  
25 strongly hydrophobic amino acids, which is presumably the simplest solution to the aggregation  
26 problem. Here we show that young genes’ few hydrophobic residues are clustered near one  
27 another along the primary sequence, presumably to assist folding. The higher aggregation risk  
28 created by the higher hydrophobicity of older genes is counteracted by more subtle effects in  
29 the ordering of the amino acids, including a reduction in the clustering of hydrophobic residues  
30 until they eventually become more interspersed than if distributed randomly. This interspersion  
31 has previously been reported to be a general property of proteins, but here we find that it is  
32 restricted to old genes. Quantitatively, the index of dispersion delineates a gradual trend, i.e. a  
33 decrease in the clustering of hydrophobic amino acids over billions of years.

34

35

## Introduction

36 Proteins need to do two things to ensure their evolutionary persistence: fold into a functional  
37 conformation whose structure and/or activity benefit the organism, and also avoid folding into  
38 harmful conformations. Amyloid aggregates are a generic structural form of any polypeptide,  
39 and so pose a danger for all proteins (Monsellier and Chiti 2007). Several lines of evidence  
40 suggest that aggregation avoidance is a critical constraint during protein evolution. Highly  
41 expressed genes are less aggregation-prone (Tartaglia *et al.* 2007), and evolve more slowly due  
42 to greater selective constraint against alleles that increase the proportion of mistranslated  
43 variants that misfold (Drummond *et al.* 2005; Drummond and Wilke 2008). Genes that homo-  
44 oligomerize or are essential (Chen and Dokholyan 2008) or that degrade slowly (De Baets *et al.*  
45 2011) are also less aggregation-prone. Aggregation-prone stretches of amino acids tend to have  
46 translationally optimal codons (Lee *et al.* 2010), and be flanked by “gatekeeper” residues  
47 (Rousseau *et al.* 2006). Disease mutations are enriched for aggregation-promoting changes  
48 (Reumers *et al.* 2009; De Baets *et al.* 2015), and known aggregation-promoting patterns are  
49 underrepresented in natural protein sequences (Broome and Hecht 2000; Buck *et al.* 2013).  
50 Thermophiles, whose amino acids need to be more hydrophobic, show exaggerated  
51 aggregation-avoidance patterns (Thangakani *et al.* 2012).

52 Here we ask whether and how proteins get better at avoiding aggregation during the course of  
53 evolution. Absent a fossil record or a time machine, biases introduced during the inference of  
54 ancestral protein states (Williams *et al.* 2006; Trudeau *et al.* 2016) make it difficult to assess  
55 how past proteins systematically differed from their modern descendants. We have therefore  
56 developed an alternative method to study protein properties as a function of evolutionary age,  
57 one that does not rely on ancestral sequence reconstruction.

58 While all living species share a common ancestor, all proteins do not. It has become clear that  
59 protein-coding genes are not all derived by gene duplication and divergence from ancient  
60 ancestors, but instead continue to originate *de novo* from non-coding sequences (McLysaght

61 and Guerzoni 2015). Different gene families (i.e. sets of homologous genes) therefore have  
62 different ages, and the properties of a gene can be a function of age.

63 The age of a gene can be estimated by means of its “phylostratum”, which is defined by the  
64 basal phylogenetic node shared with the most distantly related species in which a homolog of  
65 the gene in question can be found (Domazet-Lošo *et al.* 2007). Failure to find a still more  
66 distantly related protein homolog (i.e. failure of a gene to appear older) can have multiple  
67 causes. First, more distantly related homologs might not exist, as a consequence of de novo  
68 gene birth either from intergenic sequences or from the alternative reading frame of a different  
69 protein-coding gene (the latter yielding nucleotide but not amino acid homology). Second,  
70 apparent age might indicate the time not of de novo birth but of horizontal gene transfer (HGT)  
71 from a taxon for which no homologous genes have yet been sequenced. Third, independent  
72 loss of the entire gene family in multiple distantly related lineages can yield a pattern of  
73 apparent gain. Fourth, divergence between gene duplicates might be so extreme that  
74 homology can no longer be detected.

75 The diversity of sequenced taxa now available makes the second possibility (HGT) increasingly  
76 unlikely, especially outside microbial taxa that experience high levels of HGT; here we minimize  
77 this possibility by focusing on the set of mouse genes. The same wealth of sequenced taxa also  
78 makes the third possibility (phylogenetically independent loss of the entire gene family)  
79 unlikely, given the large number of independent loss events implied. More importantly, neither  
80 HGT nor independent loss are likely to drive systematic trends in protein properties as a  
81 function of apparent gene age; instead, they are likely to dilute any underlying patterns  
82 resulting from other determinants of apparent gene age.

83 Most critiques of the interpretation of phylostratigraphy in de novo gene terms therefore focus  
84 on the fourth possibility, specifically the concern that trends may be driven by biases in the  
85 degree to which homology is detectable (Albà and Castresana 2007; Moyers and Zhang 2015;  
86 Moyers and Zhang 2016; Moyers and Zhang 2017). In particular, homology is harder to detect  
87 for shorter and faster-evolving proteins, which might therefore appear to be young, giving false  
88 support to the conclusion than young genes are shorter and faster-evolving. The problem of

89 homology detection bias extends to any trait that is correlated with primary factors, such as  
90 length or evolutionary rate, that directly affect homology detection. We previously studied such  
91 a trait, intrinsic structural disorder (ISD), and found that statistically correcting for evolutionary  
92 rate did not affect the results, and that statistically correcting for length made them stronger  
93 (Wilson *et al.* 2017). This suggested that the pattern in ISD was likely driven by time since de  
94 novo gene birth, rather than by homology detection bias.

95 Here we trace a number of other protein properties as a function of apparent gene family age,  
96 including aggregation propensity and hydrophobicity, and find a particularly striking trend for  
97 the degree to which hydrophobic residues are clustered along the primary sequence. This  
98 trend, as with the previous ISD work, experiences negligible change after correction for length,  
99 evolutionary rate, and expression, and is thus not a result of homology detection bias. Our  
100 results point to a systematic shift in the strategies used by proteins to avoid aggregation, as a  
101 function of the amount of evolutionary time for which they have been evolving.

## 102 **Results**

103 We assigned mouse genes to gene families and to times of origin, and assigned a protein  
104 aggregation propensity score to each protein on the basis of its amino acid sequence (see  
105 Methods). No clear trend is seen in aggregation propensity as a function of gene age (Fig. 1),  
106 although all genes (black) show lower aggregation propensity than would be expected if  
107 intergenic mouse sequences were translated into polypeptides (blue). Note that intergenic  
108 sequences represent not only the raw material from which de novo genes could emerge, but  
109 also the fate of any sequence, e.g. a horizontally transferred gene, that is subjected to neutral  
110 mutational processes.

111 However, striking patterns emerge when we decompose aggregation avoidance into the effect  
112 of amino acid composition (with hydrophobic amino acids making aggregation more likely), and  
113 the effect of the exact order of a given set of amino acids. The contribution of amino acid  
114 composition alone can be assessed by scrambling the order of the amino acids (Fig. 2, top),  
115 revealing that young genes make greater use of amino acid composition to avoid aggregation.  
116 The pattern is mirrored by other measurements of the hydrophobicity of the amino acid

117 composition (Fig. 2, middle panels on the fraction of hydrophobic residues and on intrinsic  
118 structural disorder, the latter previously reported by Wilson *et al.* (2017)), with an increase in  
119 hydrophobicity taking place over ~200-400 million years. Previously reported differences in the  
120 aggregation propensity (Tartaglia *et al.* 2005) and hydrophobicity (Mannige *et al.* 2012) of  
121 proteomes from different organisms might therefore be accounted for by systematic variation  
122 among species in the composition of old vs. young genes; in our analysis, all proteins were  
123 taken from the same mouse species, removing this confounding factor. Analyses focused on a  
124 set of ancestral reconstructed sites also find a trend of recently increasing hydrophobicity in  
125 Drosophilid genomes (Yampolsky and Bouzinier 2010) that is ongoing even for ancient gene  
126 families (Yampolsky *et al.* 2017), although this data is subject to the bias of observing slightly  
127 deleterious substitutions more often than the reverse (Hurst *et al.* 2006; McDonald 2006).

128 The contribution of amino acid ordering alone, independent from amino acid composition, can  
129 be assessed as the difference between the aggregation propensity of the actual protein and  
130 that of a scrambled version of the protein. We expected real proteins to be less aggregation-  
131 prone than their scrambled controls (Buck *et al.* 2013), and confirmed this for the very oldest  
132 proteins (Fig. 3, orange confidence intervals for genes shared with prokaryotes lie below 0). But  
133 surprisingly, the opposite was true for young genes (Fig. 3, orange values for phylostrata from  
134 metazoa onward lie above 0). In other words, they are more aggregation-prone than would be  
135 expected from their amino acid composition alone.

136 One possible source of increased aggregation propensity is if young genes, struggling to achieve  
137 any kind of fold at all given their low hydrophobicity (Dill 1990), cluster their few hydrophobic  
138 amino acid residues closer together along the sequence. Such clustering could allow proteins to  
139 evolve small, foldable, potentially functional domains within an otherwise disordered sequence  
140 (Uversky *et al.* 2000). Alternatively and still more primitively, very highly localized clustering  
141 could produce short peptide motifs that cannot fold independently but acquire structure  
142 conditionally through binding or oligomerization (Gunasekaran *et al.* 2004; Davey *et al.* 2012).  
143 Hydrophobic clustering also increases the danger of aggregation (Monsellier *et al.* 2007);  
144 indeed, there is significant congruence between mutations that increase the stability of a fold

145 and those that increase the stability of the aggregated or otherwise misfolded form (Sánchez *et*  
146 *al.* 2006).

147 We find that young genes do show hydrophobic clustering, while very old genes show  
148 interspersions of hydrophobic amino acid residues (Fig. 4), and that this accounts for much of  
149 the excess aggregation propensity of young genes relative to scrambled controls (Fig. 3 blue  
150 points are closer to zero than orange points). Previous reports have suggested that the danger  
151 of aggregation selects against hydrophobic clustering (Monsellier *et al.* 2007). In other words,  
152 among consecutive blocks of amino acids, the variance in hydrophobicity is lower than the  
153 mean, i.e. the index of dispersion is less than one in proteins overall (Irbäck *et al.* 1996;  
154 Schwartz *et al.* 2001) and in the core of protein folds (Patki *et al.* 2006). In the present analysis,  
155 this holds true only for old, highly evolved proteins. Younger proteins not only appear less  
156 evolutionarily constrained to intersperse polar and hydrophobic residues, but to the contrary,  
157 their hydrophobic residues show excess concentration near one another along the sequence,  
158 increasing aggregation propensity. Our results are extremely robust when we control for  
159 protein length, evolutionary rate, and expression level (Fig. S1). Similar results, albeit not  
160 extending quite as far back in time, are found using the normalized mean length of runs of  
161 hydrophobic amino acid lengths FLIMVW (Fig. S2) as by using the more sophisticated published  
162 metric of the degree to which these amino acids are clustered (Irbäck *et al.* 1996; Irbäck and  
163 Sandelin 2000) shown in Fig. 4.

164 We investigated whether the difference might be explained by differences in the frequencies of  
165 transmembrane proteins as a function of gene age. Unfortunately, sequence-based prediction  
166 of transmembrane status is likely directly confounded with clustering, and only 137 mouse  
167 proteins have been experimentally verified as transmembrane. The increased clustering of  
168 transmembrane proteins was barely significant as a fixed effect within our linear model  
169 ( $p=0.042$ ). Because annotations are available for so few genes, we do not know whether  
170 transmembrane proteins are more likely to be old or young, and hence whether  
171 transmembrane status helps explain the trend or make it still more puzzling. The weak effect  
172 size suggests that transmembrane status might explain at best only a small portion of the trend.

173 We checked whether this trend in clustering is also found in the proteins of *Saccharomyces*  
174 *cerevisiae* (Fig. S3), which is the other species for which homologous gene family annotation  
175 was combined with gene age annotation (Wilson *et al.* 2017). The very youngest 499 putative  
176 gene families (unique to *S. cerevisiae*, and which might therefore contain non-coding sequences  
177 annotated in error, although to minimize this problem, genes annotated as “dubious” are  
178 excluded) had a clustering value of 1.035 (66% CI 1.024-1.047; central tendency and CI  
179 backtransformed from the central tendency estimate +/- one standard error derived from a  
180 linear model with and gene family as a random effect). The oldest 1,966 gene families (with  
181 homologs in prokaryotes) had clustering 0.890 (66% CI 0.886-0.895), even lower than clustering  
182 of 0.943 (66% CI 0.939-0.946) found in mouse gene families of the same age. Among the 2,467  
183 gene families allocated to eight phylostrata of intermediate age, we found no significant  
184 differences among the phylostrata ( $p=0.6$ , likelihood ratio test of linear model with gene family  
185 and random effect and phylostratum as putative fixed effect), which range from genes shared  
186 only with *S. paradoxus* to genes shared with distantly related eukaryotes. The clustering in all  
187 these phylostrata was lower than we expected from our mouse results, at 0.951 (66% CI 0.945-  
188 0.958). These results, shown in Figure S3, suggest that low clustering evolves far more rapidly,  
189 at least in the earlier stages, in unicellular yeast with short generation times and large  
190 population sizes than it does in the ancestral lineage of mice. However just as for the mouse  
191 lineage, saturation is not reached for gene families dating back “only” to an early eukaryote;  
192 genes with prokaryotic homologs have even lower clustering values than those with homologs  
193 in distantly related eukaryotes but not prokaryotes.

194 Clustering is a metric for which genes that have been evolving for longer have different  
195 properties from genes that are “less evolved”. There must either be a long-term trend in the  
196 clustering values of newborn genes as a function of the time at which they are born, or else  
197 there has been a long-term direction to evolution over billions of years. We consider the latter  
198 possibility more plausible than the former. This directionality of evolution can be interpreted as  
199 a slow shift from a primitive strategy for avoiding misfolding in young genes to more subtle  
200 strategies in old genes.



201 The primitive aggregation avoidance strategy used by young genes is simply to avoid the most  
202 hydrophobic amino acids (Fig. 2), creating intrinsic structural disorder (Linding *et al.* 2004;  
203 Thangakani *et al.* 2012; Banerjee and Chakraborty 2017; Wilson *et al.* 2017). Given such an  
204 amino acid composition, young genes might form an early folding nucleus by concentrating  
205 hydrophobic amino acids in localized regions of the sequence (Fig. 4, right), while still keeping  
206 total hydrophobicity and hence aggregation propensity within tolerable limits (Figs. 1-2). Such a  
207 folding nucleus would not necessarily be an entire independently folded domain. In particular,  
208 some origin theories posit that ancient proteins first achieved folding by becoming structured  
209 only upon binding to some interaction partner (Soding and Lupas 2003; Zhu *et al.* 2016). In  
210 contemporary proteins, potential representatives of nascent structure are found in intrinsically  
211 disordered proteins that contain peptide-length binding motifs (small linear interaction motifs;  
212 SLiMs), many of which become ordered when bound to a partner (Davey *et al.* 2012). We do  
213 not, however, find that young genes have more known SLiMs (Fig. S4).

214 In contrast to young genes, older genes have higher hydrophobicity, which must be offset by  
215 the evolution of other aggregation-avoidance strategies (Thangakani *et al.* 2012). For such  
216 changes to occur through descent with modification probably happens only slowly. Under the  
217 assumption that amino acid composition at birth does not vary systematically as a function of  
218 the time of birth, we could conclude that changing the amino acid composition of a protein  
219 takes ~200-400 million years (Fig. 2). In contrast, changing the index of dispersion might require  
220 such a large number of changes that it is extraordinarily slower, with a consistent direction to  
221 evolution visible over the entire history of life back to our common ancestor with prokaryotes.

222 Note that our two youngest phylostrata, the *Mus* phylostratum of *Mus musculus* genes shared  
223 only with *M. pahari*, and the *Rattus* phylostratum of *M. musculus* genes shared with rats, show  
224 less clustering than other young genes, suggesting that rapid change in the index of dispersion  
225 may be possible (in the other direction) after all, on short and recent timescales. However, very  
226 young gene families are subject to significantly higher death rates than other gene families  
227 (Palmieri *et al.* 2014). With gene family loss so common at first, it is possible that the rapid  
228 initial increase in clustering is due to differential retention of gene families with highly clustered  
229 amino acids. This interpretation of the data is consistent with explaining how slow the later fall

230 in clustering is, by positing that descent with modification is constrained to change clustering  
231 values slowly.

232 The youngest genes show similar clustering to what would be expected were intergenic  
233 sequences to be translated (Fig. 4, blue). Clustering of amino acids translated from non-coding  
234 intergenic sequences is a direct consequence of the clustering of nucleotides; indices of  
235 dispersion at the nucleotide level are all above the expectation of one from a Poisson process,  
236 in the range 1.2-1.9 for intergenic sequences and 1.1-1.8 for masked intergenic sequences,  
237 depending on which nucleotides are considered. (The lowest indices are found for the GC vs. AT  
238 contrast, presumably due to avoidance of CpG sites causing a general paucity of clusters of G  
239 and C.) Very short tandem duplications, e.g. as may arise from DNA polymerase slippage,  
240 automatically create segments in which the duplicated nucleotide is overrepresented; observed  
241 nucleotide clustering values greater than one can therefore be interpreted as a natural  
242 consequence of mutational processes. The consequence of this mutational pattern is therefore  
243 a small and fortuitous degree of preadaptation, i.e. intergenic sequences have a systematic  
244 tendency toward higher clustering than “random”, in a manner that facilitates the de novo birth  
245 of new genes.

## 246 **Discussion**

247 As discussed in the Introduction, apparent gene family age can be a function of time since i)  
248 gene birth, ii) HGT, iii) divergence from other phylogenetic branches all of which have  
249 independently lost all members of the gene family, or iv) rapid divergence of a gene made  
250 homology undetectable. In all cases, our results describe evolutionary outcomes as a function  
251 of time elapsed since that event. In the case of our primary result on clustering, this means that  
252 genes appear with clustering values similar to those expected from intergenic sequences, are  
253 retained only if their clustering is exceptionally high, and then show gradual declines in  
254 clustering after that.

255 We believe that gene birth is the most plausible driver of our results. HGT is rare in more recent  
256 ancestors of mice, simultaneous loss in so many branches is unlikely, and statistical correction  
257 for evolutionary rate, length and expression (Fig. S1) has, in contradiction to the predictions of

258 homology detection bias, a negligible effect on our results. However, our results on the  
259 evolution of protein properties following a defining event remain of interest under all scenarios  
260 of what the gene-age-determining event is.

261 There are three ways to explain subsequent patterns as a function of gene family age. The two  
262 mentioned so far are biases in retention after birth, and descent with modification. The third  
263 possibility is that the conditions of life were significantly different at different times, and hence  
264 so were the biochemical properties of proteins born/transferred/rapidly diverged at that time.  
265 Specifically, ancestral sequence reconstruction techniques have been used to infer that  
266 proteins in our ancestral lineage became progressively less thermophilic (Gaucher *et al.* 2008).  
267 This might explain why young genes have fewer strongly hydrophobic amino acids; they were  
268 born at more permissive lower temperatures. However, ancestral reconstruction techniques  
269 are likely biased toward consensus amino acids that are fold-stabilizing (Steipe *et al.* 1994;  
270 Lehmann *et al.* 2000; Godoy-Ruiz *et al.* 2004; Bloom and Glassman 2009) and hence may be  
271 more hydrophobic (Williams *et al.* 2006; Trudeau *et al.* 2016). Alarming, ancestral  
272 reconstruction also suggests that the ancestral mammal was a thermophile (Trudeau *et al.*  
273 2016), although Drosophilid reconstructions are compatible with a trend in the opposite  
274 direction to reconstruction bias, towards greater hydrophobicity with time (Yampolsky and  
275 Bouzinier 2010; Yampolsky *et al.* 2017).

276 The main trend that we see of hydrophobicity/thermophilicity as a function of gene age is on  
277 shorter timescales; for older gene families, billions of years of common evolution has erased  
278 the differences in starting points. It is the more subtle signal of hydrophobic amino acid  
279 interspersions that shows the long-term pattern in our analysis. However, variation in the  
280 conditions of life at the time of gene origin remains a plausible explanation for the idiosyncratic  
281 differences between phylostrata, i.e. for the remaining, statistically meaningful deviations of  
282 individual phylostrata from the trends reported here.

283 We have already invoked differential retention as a possible driver of the short-term  
284 evolutionary increase in the clustering values of young genes. It is logically possible that the  
285 long-term trend in clustering values is also a result of differential retention; if gene families with

286 higher clustering values are more likely to be lost, different gene ages represent different spans  
287 of time in which this loss has had an opportunity to occur. Given the billion year time scales and  
288 thus enormous number of lost gene families this implies, this seems at present a less plausible  
289 scenario than descent with modification for different durations following different dates of  
290 origin. In other words, descent with modification seems the most plausible of the three possible  
291 drivers of biochemical patterns as a function of gene age, independently of what exactly “gene  
292 age” means.

293 Note that our findings go in the opposite direction to those of Mannige et al. (2012), who used  
294 more speciation-dense branches as a proxy for longer effective evolutionary time intervals, to  
295 infer an evolutionary trend away from, rather than toward, hydrophobicity. Part of this  
296 discrepancy may arise from differences in which proteins are present in which species, which  
297 could be a confounding factor when Mannige et al. attributed proteome-wide trends to descent  
298 with modification. Mannige et al. also confirmed their results for single genes, but did not, in  
299 that portion of their analysis, also confirm that results were not sensitive to the difficulty of  
300 scoring speciation-density in prokaryotes.

301 We propose that our findings may be best explained by three phases of protein evolution under  
302 selection for proteins that both avoid misfolding and have a function. First, a filter during the  
303 gene birth process gives rise to low hydrophobicity in newborn genes (Wilson *et al.* 2017), as  
304 the simplest way to avoid misfolding. Second, young genes with their few hydrophobic amino  
305 acids clustered together are more likely to have functional folds that remain adaptive for some  
306 time after birth, and so are differentially retained in the period immediately after birth (when  
307 young genes are subject to very high rates of attrition (Palmieri *et al.* 2014)). Finally these two  
308 initial trends are both slowly reversed by descent with modification, continuing over billions of  
309 years of evolutionary search for better solutions for exceptions to the intrinsic correlation  
310 between propensity to fold and propensity to misfold.

311 The protein folding problem is notoriously hard. Here we see that it isn't just hard for human  
312 biochemists – it's so hard that evolution struggles with it too. Proteins evolve to find stable  
313 folds despite the correlated and ever-present danger of aggregation. They do so via a slow

314 exploration of an enormous sequence space, a search that has yet to saturate after billions of  
315 years (Povolotskaya and Kondrashov 2010). Given the enormous space that has already been  
316 searched, existing protein folds, especially of older gene families, may therefore be a highly  
317 unrepresentative sample of the typical behaviors of polypeptide chains. Protein folds are best  
318 thought of as a collection of corner cases and idiosyncratic exceptions, which are hard to find  
319 even for evolution, let alone for our “free-modeling” techniques to predict ab initio.

## 320 **Methods**

321 *M. musculus* proteins from Ensembl (v73) were assigned gene families and gene ages as  
322 described elsewhere (Wilson *et al.* 2017). To briefly outline this previous procedure, BLASTp  
323 (Altschul *et al.* 1997) against the National Center for Biotechnology Information (NCBI) nr  
324 database with an E-value threshold of 0.001 was used for preliminary age assignments for each  
325 gene, followed by a variety of quality filters. Genes unique to one species were excluded  
326 because of the danger that they were falsely annotated as protein-coding genes (McLysaght  
327 and Hurst 2016), leaving Rodentia as the youngest phylostratum. Paralogous genes were  
328 clustered into gene families, and a single age was reconciled per gene family, which filtered out  
329 some inconsistent performance of BLASTp. Numbers of genes and gene families in each  
330 phylostratum can be found for mouse in Table S1 of Wilson *et al.* (2017). “Cellular Organisms”  
331 contains all mouse gene families that share homology with a prokaryote. Yeast gene family and  
332 phylostratum annotation is taken from Table S7 of Wilson *et al.* (2017).

333 For greater resolution at shorter timescales, we used the recently sequenced *M. pahari* genome  
334 (Thybert *et al.* 2018) to compile a younger phylostratum, using Ensembl’s orthology annotation  
335 (Herrero *et al.* 2016) to find homologs in *M. musculus*. Of the 789 putative proteins excluded in  
336 Wilson *et al.* (2017) as being unique to *M. musculus*, 155 also had homologs in *M. pahari*. 9 of  
337 these also had Ensembl ortholog assignments among members of older gene families, and were  
338 excluded. BLASTp detected only one pair hitting each other among the genes with e-value <  
339 0.001; these were placed together while each of the others was placed in its own gene family,  
340 collectively forming the youngest phylostratum to be analyzed. Note also that Ensembl ortholog  
341 annotation is not as rigorous a filter to remove false positives as the rat vs mouse dN/dS

342 measures used by Wilson et al. (2017) for older phylostrata. We therefore do not expect this  
343 youngest Mus phylostratum to be entirely free of false positives. This likely explains why  
344 its hydrophobicity metrics are lower than those of Rattus. The fact that hydrophobicity is still  
345 significantly elevated above that of controls (especially as measured by ISD and by predicted  
346 aggregation propensity of scrambled sequences) suggests that the problem of contamination  
347 with sequences that are not protein-coding genes is not so profound as to exclude the  
348 phylostratum. However, it should be interpreted with caution.

349 Intergenic control sequences were also taken from previous work (Wilson *et al.* 2017). Briefly,  
350 one intergenic control sequence per gene was taken 100nt downstream from the end of the 3'  
351 end of the transcript, with stop codons excised until a length match to the neighboring protein-  
352 coding gene was obtained. A second control sequence per gene began 100nt further  
353 downstream. This choice of location ensures that control sequences are representative of  
354 genomic regions in which protein-coding genes are found. One version of the control sequences  
355 used all intergenic sequences for this procedure, a second used only RepeatMasked (Smit *et al.*  
356 2015) intergenic sequences.

357 Aggregation propensity was scored using TANGO (Fernandez-Escamilla *et al.* 2004) and Waltz  
358 (Maurer-Stroh *et al.* 2010). We counted the number of amino acids contained within runs of at  
359 least five consecutive amino acids scored to have >5% aggregation propensity, added 0.5, and  
360 divided by protein length to obtain a measure of the density of aggregation-prone regions. For  
361 those scores derived using TANGO, we then performed a Box-Cox transformation ( $\lambda=0.362$ ,  
362 optimized using only coding genes not controls, Q-Q plot shown in Fig. S6A) prior to linear  
363 model analysis in Figs. 1 and S1. Box-Cox  $\lambda$  values were determined using maximum-likelihood  
364 estimation (Box and Cox 1964) as implemented in geoR ([https://CRAN.R-](https://CRAN.R-project.org/package=geoR)  
365 [project.org/package=geoR](https://CRAN.R-project.org/package=geoR)). Central tendency estimates and confidence intervals derived from  
366 these models were then back transformed for the plots. Paired differences in TANGO scores or  
367 Waltz scores between genes and scrambled controls were not transformed. Results were  
368 qualitatively indistinguishable when runs of at least six consecutive amino acids were analyzed  
369 instead of runs of at least five.

370 “Clustering” was assessed as a normalized index of dispersion, i.e. by comparing the variance in  
371 hydrophobicity between blocks of consecutive amino acids to the mean hydrophobicity (Irbäck  
372 *et al.* 1996). Examples of high and low clustering are shown in Fig. 5. We used  $s = 6$ , with  
373 different values of  $s$  yielding qualitatively similar results. Where the amino acid length was not  
374 divisible by six, a few amino acids were neglected at one or both ends, yielding a truncated  
375 length of  $N$ , and we used the average clustering measure  $\psi$  across different phases for the  
376 blocking procedure. In Fig. 4, we average over all phases using the maximum number of blocks,  
377 e.g. only one phase for values of  $N$  divisible by 6. Results when we average over all 6 phases are  
378 very similar. Following past practice, we transformed amino acid sequences into binary  
379 hydrophobicity strings by taking the six amino acids FLIMVW as hydrophobic (+1) and scoring all  
380 the other amino acids as -1. We summed hydrophobicity scores to a value  $\sigma_k$  for each block  
381  $k = 1, \dots, N/s$  and  $M = \sum_{k=1}^{N/s} \sigma_k$  overall (Irbäck and Sandelin 2000). Our clustering score is a  
382 normalized index of dispersion

$$383 \quad \psi = \frac{s}{N} \sum_{k=1}^{N/s} \frac{1}{K} (\sigma_k - sM/N)^2,$$

384 where the normalization factor for length  $N$  and total hydrophobicity  $M$  of a protein is

$$385 \quad K = s \frac{N^2 - M^2}{N^2 - N} \left(1 - \frac{s}{N}\right).$$

386 For randomly distributed amino acids of any length  $N$  and hydrophobicity  $M$ , this normalization  
387 makes the expectation of  $\psi$  equal to 1. For clustering at the nucleotide level, blocks of length  
388  $s = 18$  rather than 6 were used. Nucleotide clustering values were calculated for each possible  
389 permutation as to which nucleotides were scored as +1 and which as -1 (e.g. G and C as +1 and  
390 A and T as -1 constitutes one permutation). Amino acid clustering values  $\psi$  were Box-Cox  
391 transformed ( $\lambda = -0.29$  for mouse,  $\lambda = -0.008$  for yeast) prior to use in linear models, with mouse  
392 Q-Q plot shown in Figure S6B.

393 To generate a scrambled control sequence that is paired to each gene, we simply sampled its  
394 amino acids without replacement. To generate clustering-controlled scrambled sequences,  
395 1000 scrambled sequences of each protein were produced, and the one that most closely  
396 matched the clustering value of the focal gene was retained. This left the average gene with a

397 clustering value 0.0035 higher than its matched control, with the mean difference of the  
398 absolute deviation between a gene and its matched control equal to 0.0057, showing a close  
399 match with little directional bias. The mean value of each property was used across 50  
400 scrambled sequences, but this led only to very modest reductions in confidence interval width  
401 relative to using a single scrambled control, e.g. ~20% in Figure 3. Because generating well-  
402 matched clustering-controlled scrambled sequences is computationally expensive, we used only  
403 a single matched-clustering scrambled control sequence per gene.

404 Transmembrane protein annotation was taken from both the “Membrane Proteins of Known  
405 3D Structure” database (Stansfeld *et al.* 2015) (<http://blanco.biomol.uci.edu/mpstruc/>,  
406 including mouse proteins whose human homolog was experimentally verified as  
407 transmembrane, accessed July 16, 2017), and from UniProt (The UniProt Consortium 2017)  
408 (transmembrane annotation “experimental” ECO:0000269, “curated” ECO:0000303 and  
409 ECO:0000305, or “homology” to a “related experimentally characterized protein” ECO:0000250,  
410 accessed November 19).

411 **Data availability.** Source data for the statistical analyses and figures are provided in  
412 Supplementary Tables S1-S6, available at Figshare and captioned in the main Supplementary  
413 Materials file. Code associated with generating and analyzing these tables is publicly available  
414 at <https://github.com/MaselLab>.

415 **Acknowledgements:** This work was supported by the John Templeton Foundation (39667,  
416 60814), and the National Institutes of Health (GM104040). The funders had no role in study  
417 design, data collection and analysis, decision to publish, or preparation of the manuscript. We  
418 thank Rafik Neme for insightful discussions, and Joost Schymkowitz and Rob van der Kant of the  
419 VIB Switch Laboratory for providing us with a stand-alone Waltz script.

420



421 **Author contributions.** J.M. conceived the general approach, M.H.J.C. conceived the clustering  
422 metric, SLiM and transmembrane protein analyses, J.B. produced Figures 5 and S2, B.A.W. fitted  
423 statistical models and produced the other final figures, S.G.F. conducted all other upstream  
424 data analysis, and J.M. wrote the paper.

425

426 **Competing interests.** The authors declare no competing financial interests.

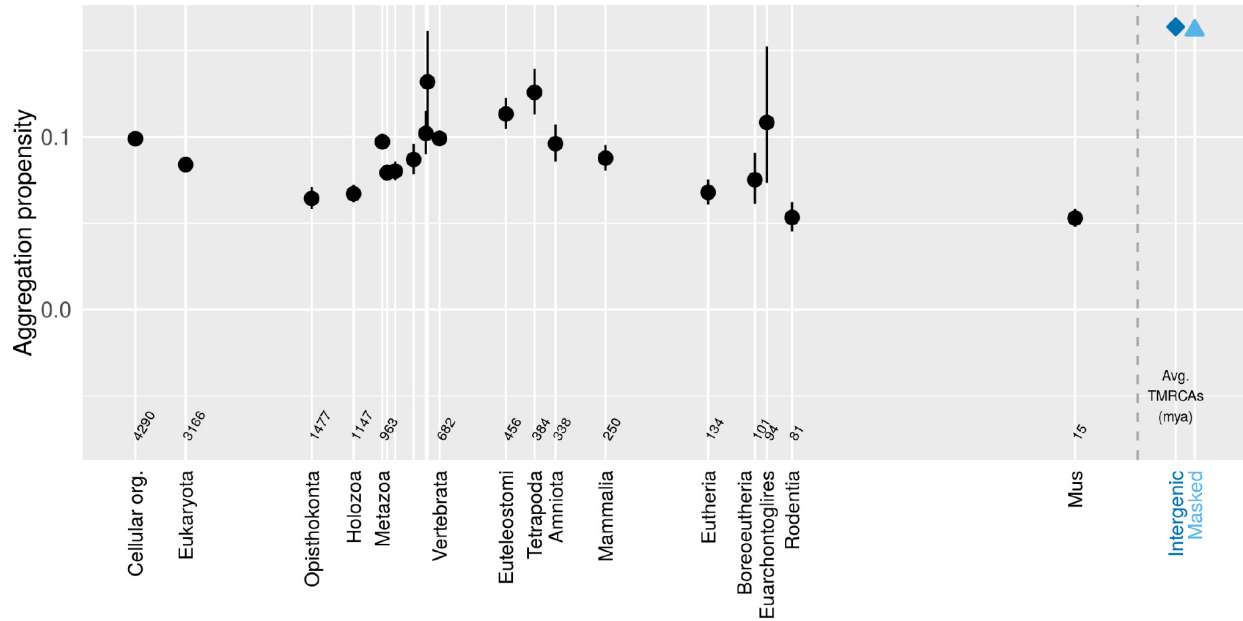

427

428 **Fig. 1.** Mouse genes show little pattern in aggregation propensity (assessed via TANGO) as a function of  
 429 age. Genes (black) show less aggregation propensity than intergenic controls (blue). Back-transformed  
 430 central tendency estimates +/- one standard error come from a linear mixed model applied to  
 431 transformed data, where gene family and phylostratum are random and fixed terms respectively.  
 432 Importantly, this means that we do not treat genes as independent data points, but instead take into  
 433 account phylogenetic confounding, and use gene families as independent data points. Times to most  
 434 recent common ancestor (TMRCAs) for most phylostrata were taken from TimeTree.org (Kumar *et al.*  
 435 2017) on February 18, 2016 and that for *M. pahari* was taken May 7, 2018. We used the arithmetic  
 436 means of the TMRCAs of the focal taxon shown on the x-axis and the preceding taxon (i.e. the estimated  
 437 midpoint of the interior branch of the tree). Cellular organism age is shown as the midpoint of the last  
 438 universal common ancestor and the last eukaryotic common ancestor. Taxon names, some of which are  
 439 omitted for space reasons, follow the sequence Metazoa, Eumetazoa, Bilateria, Deuterostomia,  
 440 Chordata, Olfactores, Vertebrata, Euteleostomi, Tetrapoda, Amniota, Mammalia, Eutheria,  
 441 Boreoeutheria, Euarchontoglires, Rodentia, Mus. The grey dashed line shows the 0 time, with control  
 442 sequences to the right of it.

443

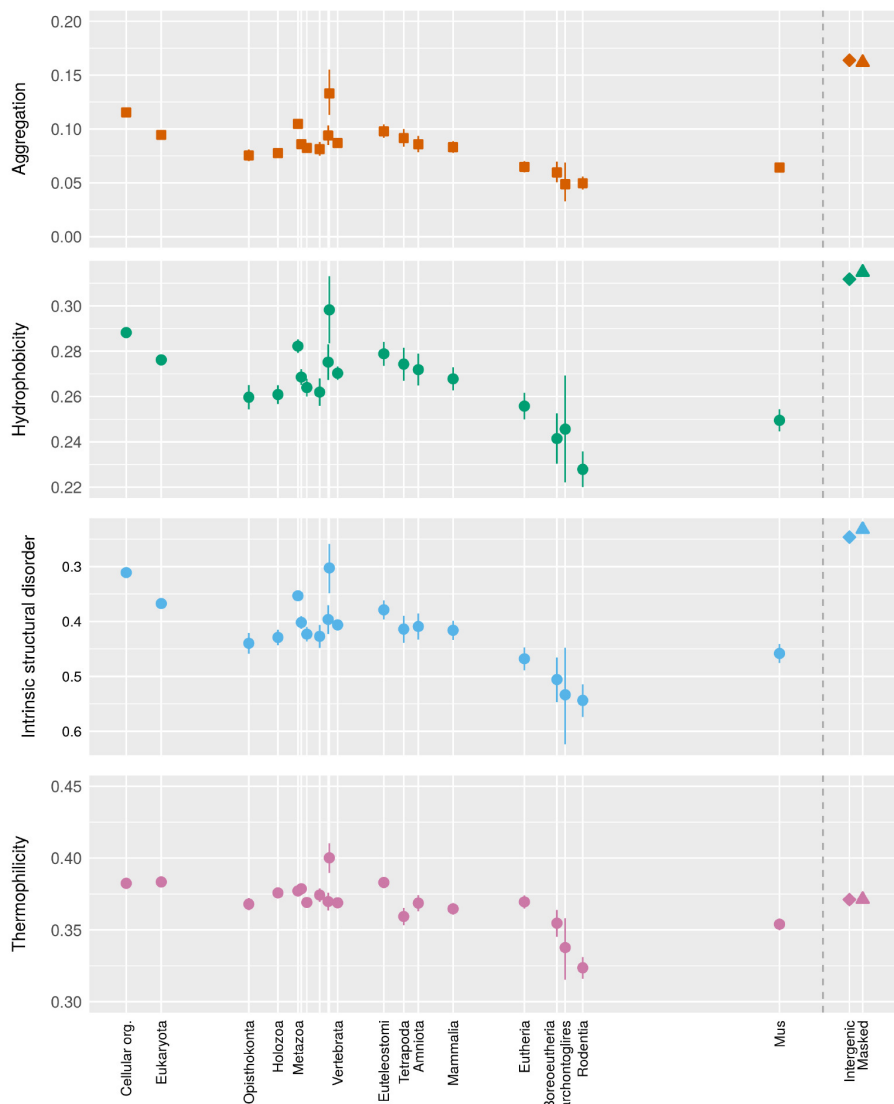

**Fig. 2.** Four different measures for the hydrophobicity of the amino acid content as a function of gene family age. “Aggregation” represents the average TANGO results from 50 scrambled versions of each gene, and hence captures the effect of amino acid composition on TANGO’s estimate of  $\beta$ -aggregation propensity. The use of scrambled genes is indicated by squares, with unscrambled genes as circles and intergenic controls as diamonds or triangles depending on whether repeat sequences are excluded. Hydrophobicity gives the

465 fraction of amino acids that are FLIMVW. The “oiliness” measurement of Mannige et al. (2012), namely  
 466 content of FLIV, is similar. Intrinsic structural disorder scores are as previously reported in Wilson et al.  
 467 (2017), shown here for more phylostrata, and inverted for easier comparison with other metrics.  
 468 Thermophilicity represents the content of ILVYWRE, as analyzed by Boussau et al. (2008), subjected to a  
 469 Box-Cox transform with  $\lambda = 2.412$  prior to model fitting; thermophilicity is dominated by the same  
 470 general hydrophobicity trend as the other measures. While the trend as a function of gene age is similar  
 471 in each case, the aggregation measurement shows the most striking deviation from intergenic control  
 472 sequences. Back-transformed central tendency estimates  $\pm$  one standard error come from a linear  
 473 mixed model, where gene family and phylostratum are random and fixed terms respectively;  $\lambda = 0.93$  is  
 474 used for hydrophobicity, other transforms are described in the Methods. The x-axis is the same as for  
 475 Figure 1.

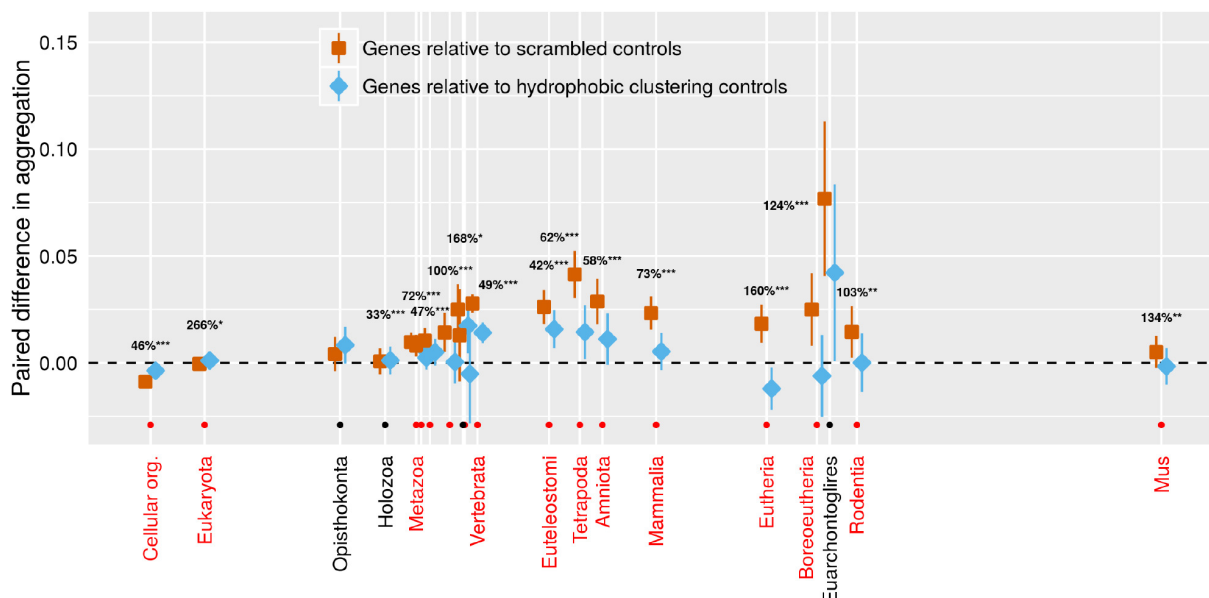

476 **Fig. 3.** Only very old genes have aggregation propensities lower than that expected from their amino  
 477 acid composition alone (orange < dashed line expectation of 0). This puzzling finding is reduced when we  
 478 account for clustering (blue is closer than orange is to the 0 dashed line) using a scrambled sequence  
 479 that is controlled to have a similar clustering value. The clustering of hydrophobic amino acids in young  
 480 genes acts to increase their aggregation propensity. 95% confidence intervals are shown, based on a  
 481 linear mixed model where gene family and phylostratum are random and fixed terms respectively. Note  
 482 that blue and orange confidence intervals should be compared only to the reference value of zero, and  
 483 not to each other, due to the paired nature of the data. For phylostrata shown in red and indicated by  
 484 an orange dot, the difference between blue and orange was significant ( $*p < 0.01$ ,  $**p < 0.001$ ,  
 485  $***p < 0.0001$ ), and the percentage of deviation from 0 accounted for by the control is shown. For most  
 486 phylostrata where the difference between blue and orange was non-significant (indicated by a black dot  
 487 and black text), the orange deviated little from 0, so there was little or nothing for the blue clustering  
 488 control to account for. Results are shown for TANGO; results for Waltz trend in the same direction but  
 489 are weaker (Fig. S5). Orange values come from the mean of 50 scrambled sequences per gene, blue  
 490 from a single scrambled sequence with a closely matched clustering value. The x-axis is the same as for  
 491 Figure 1.

492

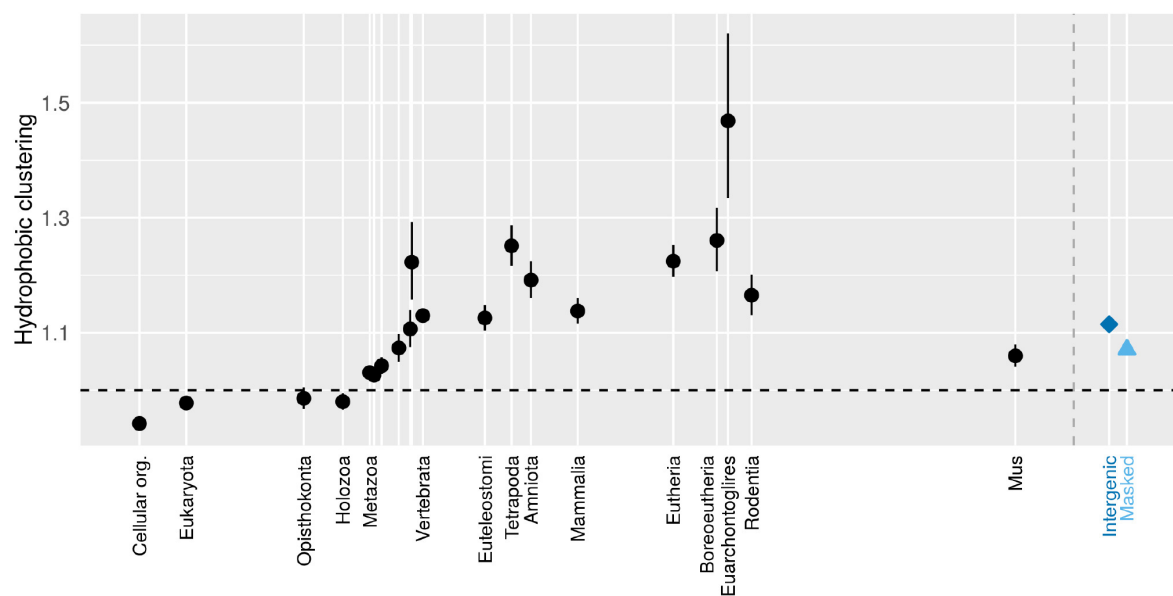

493

494 **Fig. 4.** Clustering initially follows that of its raw material, and evolves rapidly upward at first, but then  
495 decays downward extremely slowly, indicating a long-term direction of evolution. Only the oldest genes  
496 have hydrophobic amino acids spread out from each other, as previously reported; young genes have  
497 clustered hydrophobic amino acids. Back-transformed central tendency estimates  $\pm$  one standard error  
498 come from a linear mixed model, where gene family and phylostratum are random and fixed terms  
499 respectively. The x-axis is the same as for Figure 1.

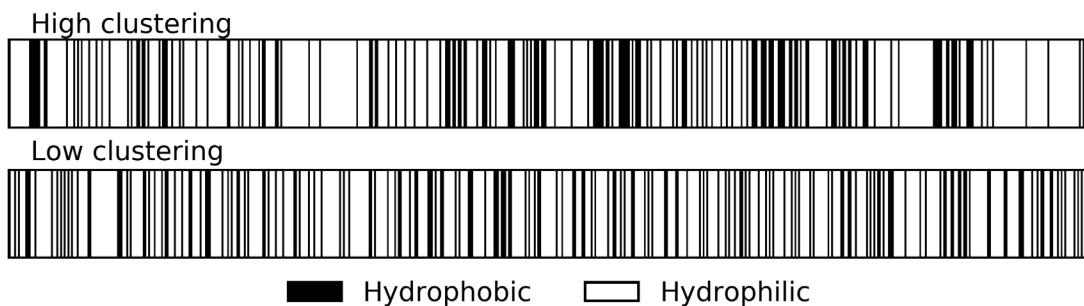

500

501 **Fig. 5.** Illustration of the distribution of hydrophobic residues along the primary sequence of proteins  
502 with high vs. low clustering, of similar lengths and net hydrophobicities. The high clustering gene Fzd5  
503 has length 585 amino acids, 31.5% hydrophobicity, and clustering of 1.58. The low clustering gene Farsb  
504 has length 589 amino acids, 31.6% hydrophobicity, and clustering of 0.69.

505

## References

- 506 Albà, M. M., and J. Castresana, 2007 On homology searches by protein Blast and the characterization of  
507 the age of genes. *BMC Evol. Biol.* 7: 1-8.
- 508 Altschul, S. F., T. L. Madden, A. A. Schäffer, J. Zhang, Z. Zhang *et al.*, 1997 Gapped BLAST and PSI-BLAST: a  
509 new generation of protein database search programs. *Nucleic Acids Res.* 25: 3389-3402.
- 510 Banerjee, S., and S. Chakraborty, 2017 Protein intrinsic disorder negatively associates with gene age in  
511 different eukaryotic lineages. *Molecular BioSystems* 13: 2044-2055.
- 512 Bloom, J. D., and M. J. Glassman, 2009 Inferring Stabilizing Mutations from Protein Phylogenies:  
513 Application to Influenza Hemagglutinin. *PLoS Comput. Biol.* 5: e1000349.
- 514 Boussau, B., S. Blanquart, A. Necsulea, N. Lartillot and M. Gouy, 2008 Parallel adaptations to high  
515 temperatures in the Archaean eon. *Nature* 456: 942-945.
- 516 Box, G. E. P., and D. R. Cox, 1964 An Analysis of Transformations. *Journal of the Royal Statistical Society.*  
517 *Series B (Methodological)* 26: 211-252.
- 518 Broome, B. M., and M. H. Hecht, 2000 Nature disfavors sequences of alternating polar and non-polar  
519 amino acids: implications for amyloidogenesis. *J. Mol. Biol.* 296: 961-968.
- 520 Buck, P. M., S. Kumar and S. K. Singh, 2013 On the Role of Aggregation Prone Regions in Protein  
521 Evolution, Stability, and Enzymatic Catalysis: Insights from Diverse Analyses. *PLoS Comput Biol* 9:  
522 e1003291.
- 523 Chen, Y., and N. V. Dokholyan, 2008 Natural Selection against Protein Aggregation on Self-Interacting  
524 and Essential Proteins in Yeast, Fly, and Worm. *Mol. Biol. Evol.* 25: 1530-1533.
- 525 Davey, N. E., K. Van Roey, R. J. Weatheritt, G. Toedt, B. Uyar *et al.*, 2012 Attributes of short linear motifs.  
526 *Molecular BioSystems* 8: 268-281.
- 527 De Baets, G., J. Reumers, J. Delgado Blanco, J. Dopazo, J. Schymkowitz *et al.*, 2011 An Evolutionary  
528 Trade-Off between Protein Turnover Rate and Protein Aggregation Favors a Higher Aggregation  
529 Propensity in Fast Degrading Proteins. *PLoS Comput Biol* 7: e1002090.
- 530 De Baets, G., L. Van Doorn, F. Rousseau and J. Schymkowitz, 2015 Increased Aggregation Is More  
531 Frequently Associated to Human Disease-Associated Mutations Than to Neutral Polymorphisms.  
532 *PLoS Comput Biol* 11: e1004374.
- 533 Dill, K. A., 1990 Dominant forces in protein folding. *Biochemistry* 29: 7133-7155.
- 534 Domazet-Lošo, T., J. Brajković and D. Tautz, 2007 A phylostratigraphy approach to uncover the genomic  
535 history of major adaptations in metazoan lineages. *Trends Genet.* 23: 533-539.
- 536 Drummond, D. A., J. D. Bloom, C. Adami, C. O. Wilke and F. H. Arnold, 2005 Why highly expressed  
537 proteins evolve slowly. *Proc. Natl. Acad. Sci. USA* 102: 14338-14343.
- 538 Drummond, D. A., and C. O. Wilke, 2008 Mistranslation-Induced Protein Misfolding as a Dominant  
539 Constraint on Coding-Sequence Evolution. *Cell* 134: 341-352.
- 540 Fernandez-Escamilla, A. M., F. Rousseau, J. Schymkowitz and L. Serrano, 2004 Prediction of sequence-  
541 dependent and mutational effects on the aggregation of peptides and proteins. *Nat. Biotechnol.*  
542 22: 1302-1306.
- 543 Gaucher, E. A., S. Govindarajan and O. K. Ganesh, 2008 Palaeotemperature trend for Precambrian life  
544 inferred from resurrected proteins. *Nature* 451: 704-707.
- 545 Godoy-Ruiz, R., R. Perez-Jimenez, B. Ibarra-Molero and J. M. Sanchez-Ruiz, 2004 Relation Between  
546 Protein Stability, Evolution and Structure, as Probed by Carboxylic Acid Mutations. *J. Mol. Biol.*  
547 336: 313-318.
- 548 Gunasekaran, K., C.-J. Tsai and R. Nussinov, 2004 Analysis of Ordered and Disordered Protein Complexes  
549 Reveals Structural Features Discriminating Between Stable and Unstable Monomers. *J. Mol. Biol.*  
550 341: 1327-1341.

- 551 Herrero, J., M. Muffato, K. Beal, S. Fitzgerald, L. Gordon *et al.*, 2016 Ensembl comparative genomics  
552 resources. Database 2016: bav096.
- 553 Hurst, L. D., E. J. Feil and E. P. C. Rocha, 2006 Causes of trends in amino-acid gain and loss. Nature 442:  
554 E11-E12.
- 555 Irbäck, A., C. Peterson and F. Potthast, 1996 Evidence for nonrandom hydrophobicity structures in  
556 protein chains. Proc. Natl. Acad. Sci. USA 93: 9533-9538.
- 557 Irbäck, A., and E. Sandelin, 2000 On Hydrophobicity Correlations in Protein Chains. Biophysical Journal  
558 79: 2252-2258.
- 559 Kumar, S., G. Stecher, M. Suleski and S. B. Hedges, 2017 TimeTree: A Resource for Timelines, Timetrees,  
560 and Divergence Times. Mol. Biol. Evol. 34: 1812-1819.
- 561 Lee, Y., T. Zhou, G. G. Tartaglia, M. Vendruscolo and C. O. Wilke, 2010 Translationally optimal codons  
562 associate with aggregation-prone sites in proteins. Proteomics 10: 4163-4171.
- 563 Lehmann, M., L. Pasamontes, S. F. Lassen and M. Wyss, 2000 The consensus concept for thermostability  
564 engineering of proteins. BBA-Protein Struct. M. 1543: 408-415.
- 565 Linding, R., J. Schymkowitz, F. Rousseau, F. Diella and L. Serrano, 2004 A Comparative Study of the  
566 Relationship Between Protein Structure and  $\beta$ -Aggregation in Globular and Intrinsically  
567 Disordered Proteins. J. Mol. Biol. 342: 345-353.
- 568 Mannige, R. V., C. L. Brooks and E. I. Shakhnovich, 2012 A Universal Trend among Proteomes Indicates  
569 an Oily Last Common Ancestor. PLoS Comput. Biol. 8: e1002839.
- 570 Maurer-Stroh, S., M. Debulpaep, N. Kuemmerer, M. Lopez de la Paz, I. C. Martins *et al.*, 2010 Exploring  
571 the sequence determinants of amyloid structure using position-specific scoring matrices. Nature  
572 Methods 7: 237-242.
- 573 McDonald, J. H., 2006 Apparent Trends of Amino Acid Gain and Loss in Protein Evolution Due to Nearly  
574 Neutral Variation. Mol. Biol. Evol. 23: 240-244.
- 575 McLysaght, A., and D. Guerzoni, 2015 New genes from non-coding sequence: the role of de novo  
576 protein-coding genes in eukaryotic evolutionary innovation. Phil. Trans. R. Soc. B 370: 20140332.
- 577 McLysaght, A., and L. D. Hurst, 2016 Open questions in the study of de novo genes: what, how and why.  
578 Nature Reviews Genetics 17: 567-578.
- 579 Monsellier, E., and F. Chiti, 2007 Prevention of amyloid-like aggregation as a driving force of protein  
580 evolution. EMBO Rep. 8: 737-742.
- 581 Monsellier, E., M. Ramazzotti, P. P. de Laureto, G.-G. Tartaglia, N. Taddei *et al.*, 2007 The Distribution of  
582 Residues in a Polypeptide Sequence Is a Determinant of Aggregation Optimized by Evolution.  
583 Biophysical Journal 93: 4382-4391.
- 584 Moyers, B. A., and J. Zhang, 2015 Phylostratigraphic Bias Creates Spurious Patterns of Genome  
585 Evolution. Mol. Biol. Evol. 32: 258-267.
- 586 Moyers, B. A., and J. Zhang, 2016 Evaluating Phylostratigraphic Evidence for Widespread De Novo Gene  
587 Birth in Genome Evolution. Mol. Biol. Evol. 33: 1245-1256.
- 588 Moyers, B. A., and J. Zhang, 2017 Further Simulations and Analyses Demonstrate Open Problems of  
589 Phylostratigraphy. Genome Biol. Evol. 9: 1519-1527.
- 590 Palmieri, N., C. Kosiol and C. Schlötterer, 2014 The life cycle of *Drosophila* orphan genes. eLife 3: e01311.
- 591 Patki, A. U., A. C. Hausrath and M. H. J. Cordes, 2006 High Polar Content of Long Buried Blocks of  
592 Sequence in Protein Domains Suggests Selection Against Amyloidogenic Non-polar Sequences. J.  
593 Mol. Biol. 362: 800-809.
- 594 Povolotskaya, I. S., and F. A. Kondrashov, 2010 Sequence space and the ongoing expansion of the  
595 protein universe. Nature 465: 922-926.
- 596 Reumers, J., S. Maurer-Stroh, J. Schymkowitz and F. Rousseau, 2009 Protein sequences encode  
597 safeguards against aggregation. Hum. Mutat. 30: 431-437.



- 598 Rousseau, F., L. Serrano and J. W. H. Schymkowitz, 2006 How Evolutionary Pressure Against Protein  
599 Aggregation Shaped Chaperone Specificity. *J. Mol. Biol.* 355: 1037-1047.
- 600 Sánchez, I. E., J. Tejero, C. Gómez-Moreno, M. Medina and L. Serrano, 2006 Point Mutations in Protein  
601 Globular Domains: Contributions from Function, Stability and Misfolding. *J. Mol. Biol.* 363: 422-  
602 432.
- 603 Schwartz, R., S. Istrail and J. King, 2001 Frequencies of amino acid strings in globular protein sequences  
604 indicate suppression of blocks of consecutive hydrophobic residues. *Protein Science* 10: 1023-  
605 1031.
- 606 Smit, A., R. Hubley and P. Green, 2015 RepeatMasker Open-4.0 version 4.0.5.  
607 [url=http://www.repeatmasker.org](http://www.repeatmasker.org).
- 608 Soding, J., and A. N. Lupas, 2003 More than the sum of their parts: on the evolution of proteins from  
609 peptides. *BioEssays* 25: 837-846.
- 610 Stansfeld, Phillip J., Joseph E. Goose, M. Caffrey, Elisabeth P. Carpenter, Joanne L. Parker *et al.*, 2015  
611 MemProtMD: Automated Insertion of Membrane Protein Structures into Explicit Lipid  
612 Membranes. *Structure* 23: 1350-1361.
- 613 Steipe, B., B. Schiller, A. Plückthun and S. Steinbacher, 1994 Sequence Statistics Reliably Predict  
614 Stabilizing Mutations in a Protein Domain. *J. Mol. Biol.* 240: 188-192.
- 615 Tartaglia, G. G., S. Pechmann, C. M. Dobson and M. Vendruscolo, 2007 Life on the edge: a link between  
616 gene expression levels and aggregation rates of human proteins. *Trends Biochem. Sci.* 32: 204-  
617 206.
- 618 Tartaglia, G. G., R. Pellarin, A. Cavalli and A. Caflisch, 2005 Organism complexity anti-correlates with  
619 proteomic  $\beta$ -aggregation propensity. *Protein Science* 14: 2735-2740.
- 620 Thangakani, A. M., S. Kumar, D. Velmurugan and M. S. M. Gromiha, 2012 How do thermophilic proteins  
621 resist aggregation? *Proteins: Struct. Funct. Bioinf.* 80: 1003-1015.
- 622 The UniProt Consortium, 2017 UniProt: the universal protein knowledgebase. *Nucleic Acids Res.* 45:  
623 D158-D169.
- 624 Thybert, D., M. Roller, F. C. P. Navarro, I. Fiddes, I. Streeter *et al.*, 2018 Repeat associated mechanisms of  
625 genome evolution and function revealed by the *Mus caroli* and *Mus pahari* genomes. *Genome*  
626 *Res.* 28: 448-459.
- 627 Trudeau, D. L., M. Kaltenbach and D. S. Tawfik, 2016 On the Potential Origins of the High Stability of  
628 Reconstructed Ancestral Proteins. *Mol. Biol. Evol.* 33: 2633-2641.
- 629 Uversky, V. N., J. R. Gillespie and A. L. Fink, 2000 Why are "natively unfolded" proteins unstructured  
630 under physiologic conditions? *Proteins* 41: 415-427.
- 631 Williams, P. D., D. D. Pollock, B. P. Blackburne and R. A. Goldstein, 2006 Assessing the Accuracy of  
632 Ancestral Protein Reconstruction Methods. *PLoS Comput. Biol.* 2: e69.
- 633 Wilson, B. A., S. G. Foy, R. Neme and J. Masel, 2017 Young genes are highly disordered as predicted by  
634 the preadaptation hypothesis of de novo gene birth. *Nat. Ecol. Evol.* 1: 0146.
- 635 Yampolsky, L. Y., and M. A. Bouzinier, 2010 Evolutionary patterns of amino acid substitutions in 12  
636 *Drosophila* genomes. *BMC Genomics* 11: S10.
- 637 Yampolsky, L. Y., Y. I. Wolf and M. A. Bouzinier, 2017 Net Evolutionary Loss of Residue Polarity in  
638 *Drosophilid* Protein Cores Indicates Ongoing Optimization of Amino Acid Composition. *Genome*  
639 *Biol. Evol.* 9: 2879-2892.
- 640 Zhu, H., E. Sepulveda, M. D. Hartmann, M. Kogenaru, A. Ursinus *et al.*, 2016 Origin of a folded repeat  
641 protein from an intrinsically disordered ancestor. *eLife* 5: e16761.

642

643
